# Supplementary material for: Prevalence of Cirrhosis/Advanced Fibrosis Among HBsAg-Negative and HBcAb-Positive US Adults: A Nationwide Population-Based Study
Source: PubMed Central journal article supplement — Infect Dis Ther. 2022 Aug 8;11(5):1901–16. doi: 10.1007/s40121-022-00680-2 (PMC9617979; doi:10.1007/s40121-022-00680-2), 2022-08-08
Supplement: 40121_2022_680_MOESM1_ESM.pdf [file 40121_2022_680_MOESM1_ESM.pdf]

# **Prevalence of cirrhosis/advanced fibrosis among HBsAg-negative and HBcAb-positive US adults: a nationwide population-based study**

Shuai-Wen Huang<sup>1,3</sup>, Chen Chen<sup>2</sup>, Hong-Yan Kong<sup>1,3</sup>, Jia-Quan Huang<sup>1,3\*</sup>

<sup>1</sup>Department and Institute of Infectious Disease, Tongji Hospital, Tongji Medical College, Huazhong University of Science and Technology, Wuhan, Hubei, China;

<sup>2</sup>Department of Epidemiology, School of Public Health, University of Michigan, Ann Arbor, MI, USA;

<sup>3</sup>National Medical Center for Major Public Health Events, Wuhan, China.

**\*Correspondence to** Jia-Quan Huang, MD, Department and Institute of Infectious Disease, Tongji Hospital, Tongji Medical College, Huazhong University of Science and Technology, Wuhan, Hubei, P. R. China.

**Email:** [huangjiaquan21@aliyun.com](mailto:huangjiaquan21@aliyun.com)

**Table S1. Trends analyses for cirrhosis<sup>#</sup> in the US adults with HBsAg-negative and HBcAb-positive from 2001-2018. \***

|                                      | % With cirrhosis <sup>&amp;</sup> |
|--------------------------------------|-----------------------------------|
| <b>Rao-Scott <math>\chi^2</math></b> | P=0.19                            |
| <b>Linear regression</b>             | R <sup>2</sup> =0.00045, P=0.77   |

\*Adjusting for sampling weights and accounted for complex survey designs; <sup>#</sup>defined as FIB4 >3.25.

**Table S2. Prevalence of cirrhosis (defined as APRI>1) by selected characteristics in US adults with HBsAg-negative and HBcAb-positive, NHANES, 2001–18. #**

| Characteristics           | NHANES 2001-2018  | NHANES 2001-2006  | NHANES 2007-2012   | NHANES 2013-2018   |
|---------------------------|-------------------|-------------------|--------------------|--------------------|
|                           | (Total)           | (Era 1)           | (Era 2)            | (Era 3)            |
|                           | Adjusted %(95%CI) | Adjusted %(95%CI) | Adjusted % (95%CI) | Adjusted % (95%CI) |
| <b>Overall</b>            | 4.13(3.12-5.13)   | 3.47(2.30-4.64)   | 5.33(3.36-7.30)    | 3.75(1.60-5.90)    |
| <b>Sex</b>                |                   |                   |                    |                    |
| <b>Male</b>               | 5.78(4.02-7.53)   | 4.63(2.44-6.82)   | 8.25(4.44-12.05)   | 5.00(1.59-8.41)    |
| <b>Female</b>             | 2.05(1.18-2.93)   | 1.96(-0.02-3.95)  | 2.20(1.15-3.25)    | 2.01(0.70-3.31)    |
| <b>Age groups (years)</b> |                   |                   |                    |                    |
| <b>20-39</b>              | 0.93(0.24-1.74)   | 0.33(-0.32-0.99)  | 1.50(-0.32-3.33)   | 1.50(-0.26-3.27)   |
| <b>40-59</b>              | 5.29(3.67-6.91)   | 5.53(3.33-7.74)   | 7.56(3.28-11.83)   | 2.65(0.93-4.37)    |
| <b>60+</b>                | 4.22(2.20-6.24)   | 2.21(0.86-3.56)   | 4.20(1.82-6.58)    | 5.62(1.09-10.15)   |
| <b>BMI:</b>               |                   |                   |                    |                    |
| <b>&lt;25</b>             | 3.22(2.15-4.29)   | 3.07(1.96-4.18)   | 3.93(1.57-6.29)    | 2.39(-0.09-4.88)   |
| <b>25-30</b>              | 5.40(2.97-7.82)   | 3.46(0.94-5.99)   | 8.67(4.45-12.89)   | 4.49(-2.33-11.33)  |
| <b>&gt;30</b>             | 3.34(1.65-5.02)   | 3.72(0.34-7.10)   | 3.76(0.77-6.74)    | 2.26(0.34-4.19)    |

|                                    |                   |                   |                   |                   |
|------------------------------------|-------------------|-------------------|-------------------|-------------------|
| <b>Ethnicity:</b>                  |                   |                   |                   |                   |
| <b>Non-Hispanic white</b>          | 5.60(3.23-7.96)   | 4.77(2.51-7.02)   | 8.29(2.28-14.30)  | 4.45(-0.37-9.27)  |
| <b>Non-Hispanic black</b>          | 4.01(2.80-5.22)   | 3.03(1.48-4.57)   | 4.90(2.41-7.41)   | 4.26(1.88-6.65)   |
| <b>Others</b>                      | 2.50(1.59-3.40)   | 1.76(0.53-2.98)   | 2.92(1.09-4.74)   | 2.71(1.15-4.26)   |
| <b>Education:</b>                  |                   |                   |                   |                   |
| <b>Less than high school</b>       | 4.87(3.43-6.32)   | 3.85(2.29-5.41)   | 7.64(3.73-11.55)  | 3.50(1.40-5.61)   |
| <b>High school or above</b>        | 3.86(2.57-5.37)   | 3.33(1.81-4.85)   | 4.51(2.04-6.98)   | 3.84(1.09-6.60)   |
| <b>Income-poverty ratio level:</b> |                   |                   |                   |                   |
| <b>0-1.0</b>                       | 5.03(3.03-7.02)   | 3.18(0.39-5.96)   | 7.16 (2.58-11.74) | 4.83(1.71-7.95)   |
| <b>&gt;1.0</b>                     | 4.13(2.89-5.37)   | 3.68(2.23-5.13)   | 5.26(3.00-7.52)   | 3.62(0.72-6.51)   |
| <b>Alcohol drinking:</b>           |                   |                   |                   |                   |
| <b>Non-drinker</b>                 | 1.71(0.74-2.68)   | 0.84(-0.15-1.85)  | 2.54(0.27-4.82)   | 1.95(-0.01-3.93)  |
| <b>drinker</b>                     | 5.29(3.78-6.82)   | 4.49(3.05-6.92)   | 6.48(3.34-9.62)   | 4.64(1.62-7.65)   |
| <b>Smoking status:</b>             |                   |                   |                   |                   |
| <b>Never smoker</b>                | 2.13(0.98-3.27)   | 1.22(0.11-2.33)   | 3.61(0.43-6.78)   | 1.61(0.53-2.68)   |
| <b>Former smoker</b>               | 5.04(2.47-7.61)   | 6.63(3.37-9.89)   | 2.48(0.17-4.80)   | 5.62(-0.83-12.09) |
| <b>Current smoker</b>              | 6.82(4.41-9.22)   | 4.00(1.52-6.48)   | 11.86(5.80-17.92) | 6.40(1.77-11.03)  |
| <b>Liver disease</b>               |                   |                   |                   |                   |
| <b>No</b>                          | 2.72(1.88-3.56)   | 2.27(1.06-3.48)   | 3.97(2.13-5.80)   | 2.07(0.65-3.49)   |
| <b>Yes</b>                         | 14.41(8.64-20.18) | 12.91(5.19-20.62) | 15.20(5.74-24.65) | 15.17(2.86-27.48) |
| <b>Diabetes</b>                    |                   |                   |                   |                   |
| <b>No</b>                          | 3.88(2.87-4.95)   | 3.79(2.47-5.11)   | 4.80(2.48-7.13)   | 3.14 (1.06-5.21)  |
| <b>Yes</b>                         | 5.90(2.90-8.90)   | 0.86(-0.43-2.16)  | 8.97(4.40-13.55)  | 7.68(0.67-14.69)  |
| <b>Hypertension</b>                |                   |                   |                   |                   |
| <b>No</b>                          | 3.66(2.62-4.69)   | 3.91(2.38-5.44)   | 4.81(2.21-7.41)   | 2.15(1.01-3.29)   |

|                       |                  |                  |                  |                  |
|-----------------------|------------------|------------------|------------------|------------------|
| <b>Yes</b>            | 5.18(3.02-7.34)  | 2.20(0.79-3.62)  | 6.57(4.60-8.54)  | 6.40(1.37-11.45) |
| <b>HBsAb negative</b> |                  |                  |                  |                  |
| <b>No</b>             | 3.09(2.13-4.05)  | 2.69(1.22-4.16)  | 4.17(2.11-6.24)  | 2.56(0.97-4.15)  |
| <b>Yes</b>            | 7.93(4.60-11.26) | 6.90(1.92-11.83) | 9.11(4.09-14.13) | 7.74(0.66-14.83) |

# All estimates accounted for complex survey designs and sampling weights of NHANES.

**Table S3. Prevalence of cirrhosis (defined by LSM, APRI, or FIB-4) in US adults with HBsAg-negative and HBcAb-positive, NHANES, 2017–2018. #**

| Cirrhosis                      | Cirrhosis defined by LSM/APRI/FIB-4 |               |                 |
|--------------------------------|-------------------------------------|---------------|-----------------|
|                                | LSM (>13.4 kPa) *                   | APRI (>1.0) % | FIB-4 (>3.25) § |
|                                | N=352                               | N=367         | N=367           |
| <b>Adjusted prevalence (%)</b> | 4.89                                | 3.94          | 1.62            |

\* Cirrhosis defined as median liver stiffness measurement (LSM) >13.4kPa; % Cirrhosis defined as APRI>1.0; § Cirrhosis defined as FIB-4>3.25;

# All estimates accounted for complex survey designs and sampling weights of NHANES.

**Table S4. The proportion of awareness of hepatitis B virus infection and received therapy for hepatitis B in US adults with HBsAg-negative and HBcAb-positive, NHANES, 2013-2018 (N=1150).#**

|                                | Awareness of HBV infection(N=75) | Ever received therapy for hepatitis B (N=10) |
|--------------------------------|----------------------------------|----------------------------------------------|
| <b>Adjusted Proportion (%)</b> | 8.84                             | 1.68                                         |

# All estimates accounted for complex survey designs and sampling weights of NHANES.

**Table S5. Prevalence of cirrhosis (FIB>3.25) by awareness of HBV infection or not in US adults with HBsAg-negative and HBcAb-positive, NHANES, 2013–18. #**

|                                | Awareness of HBV infection(N=75) | Unawareness of HBV infection(N=1062) |
|--------------------------------|----------------------------------|--------------------------------------|
| <b>Adjusted prevalence (%)</b> | 3.54                             | 3.29                                 |

# All estimates accounted for complex survey designs and sampling weights of NHANES.

**Table S6. Prevalence of cirrhosis by the controlled attenuated parameter (CAP) in US adults with HBsAg-negative and HBcAb-positive, NHANES, 2017–18. #**

| Cirrhosis              | Cirrhosis defined by LSM/APRI/FIB-4 |               |                  |
|------------------------|-------------------------------------|---------------|------------------|
|                        | LSM (>13.4 kPa) *                   | APRI (>1.0) % | FIB-4 (>3.25) \$ |
| <b>CAP≥238 dB/s</b>    | 6.61                                | 5.62          | 1.56             |
| <b>CAP&lt;238 dB/s</b> | 1.81                                | 1.52          | 1.52             |

# All estimates accounted for complex survey designs and sampling weights of NHANES.
